# Supplementary material
Source: PubMed Central journal article supplement (PMC4186227)
Supplement: rstb20130473supp1.pdf [file rstb20130473supp1.pdf]

## Supplementary figures

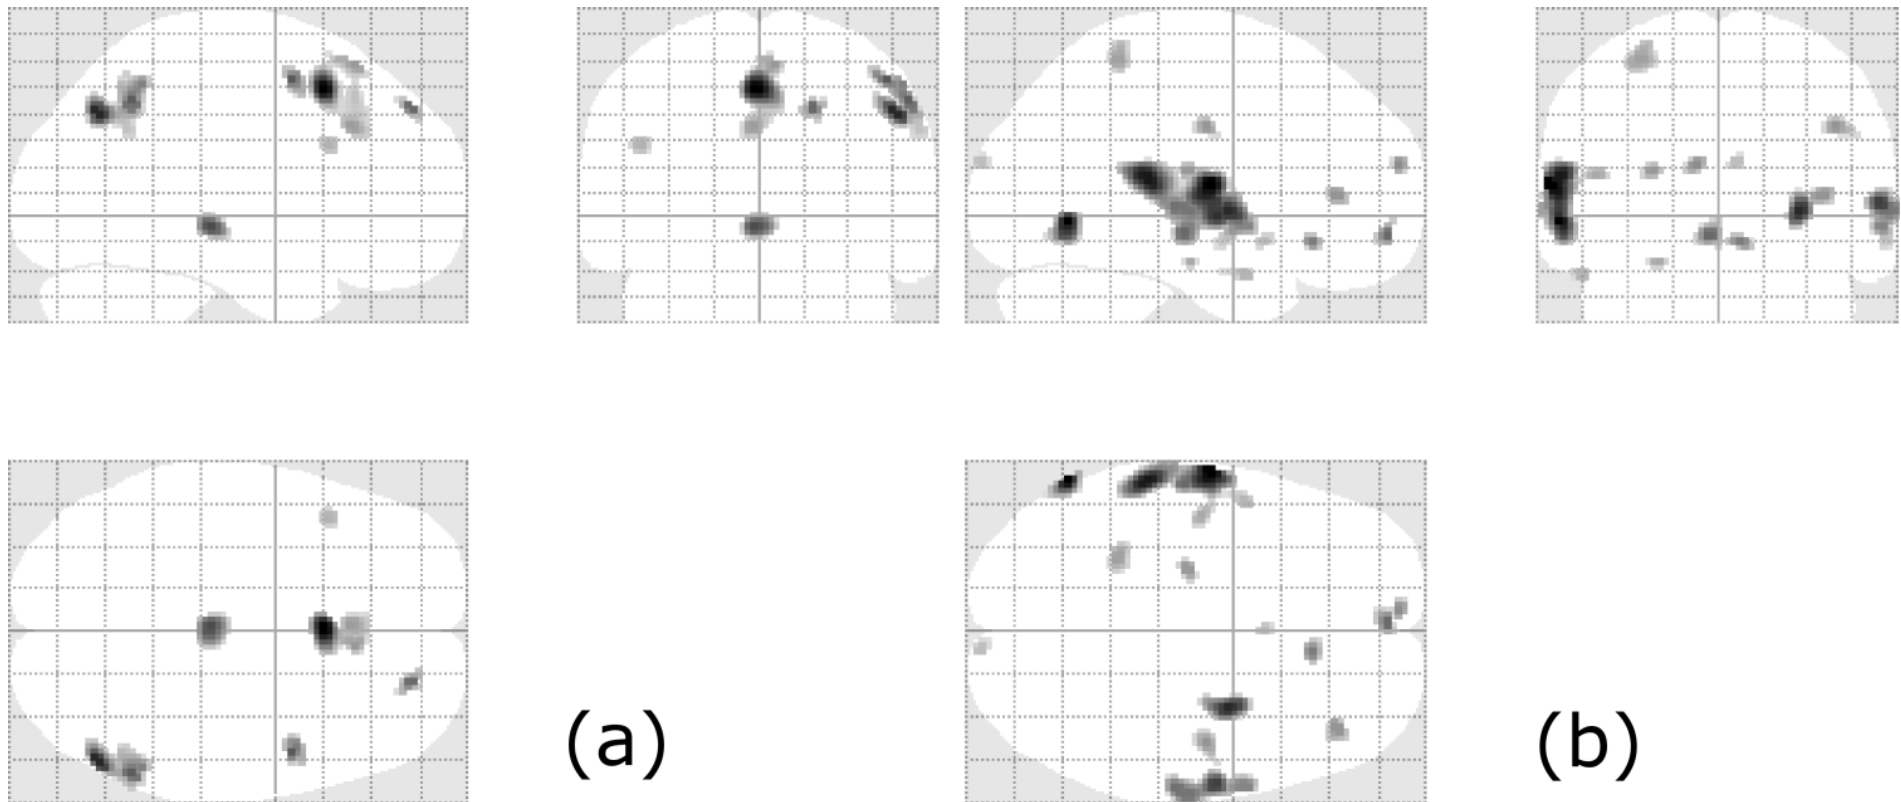

**Figure S1. fMRI results used as priors.** Glass brain representation of the fMRI results used as priors in the source localization. a) difference in value between unchosen and chosen alternatives. b) chosen value. Both shown at 0.005 (unc.)

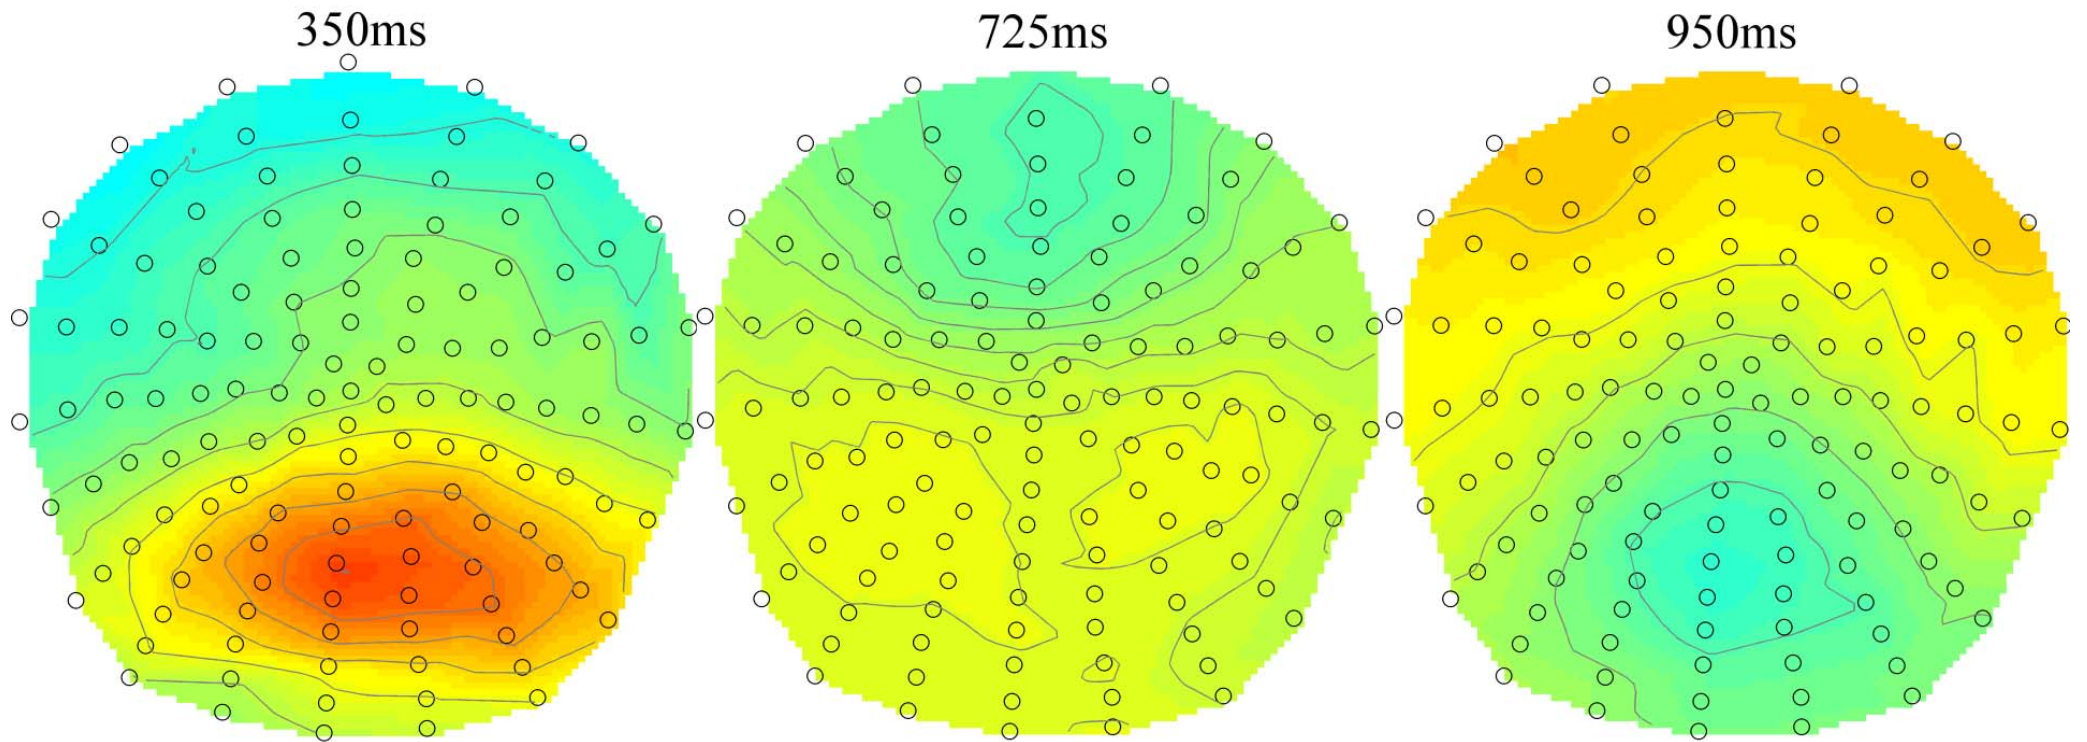

**Figure S2. Scalp activity map of high-low value trials.** Amplitude difference in scalp activity between trials with high value and low value chosen actions interpolated between electrodes. Each time shown corresponds to each of the time windows shown in Figure 5.
